# Supplementary material for: Vine-Twining Inclusion Behavior of Amylose towards Hydrophobic Polyester, Poly(β-propiolactone), in Glucan Phosphorylase-Catalyzed Enzymatic Polymerization
Source: MDPI journal article supplement (doi:10.3390/life13020294), 2023-01-20
Supplement: s1 [file s1]

## **Supporting Information**

# **Vine-twining Inclusion Behavior of Amylose Towards Hydrophobic Polyester, Poly( $\beta$ -propiolactone), in Glucan Phosphorylase-catalyzed Enzymatic Polymerization**

Masa-aki Iwamoto<sup>a</sup> and Jun-ichi Kadokawa<sup>a,\*</sup>

<sup>a</sup> Graduate School of Science and Engineering, Kagoshima University, 1-21-40 Korimoto, Kagoshima 890-0065, Japan

\*E-mail : kadokawa@eng.kagoshima-u.ac.jp ; Tel.: +81-99-285-7743

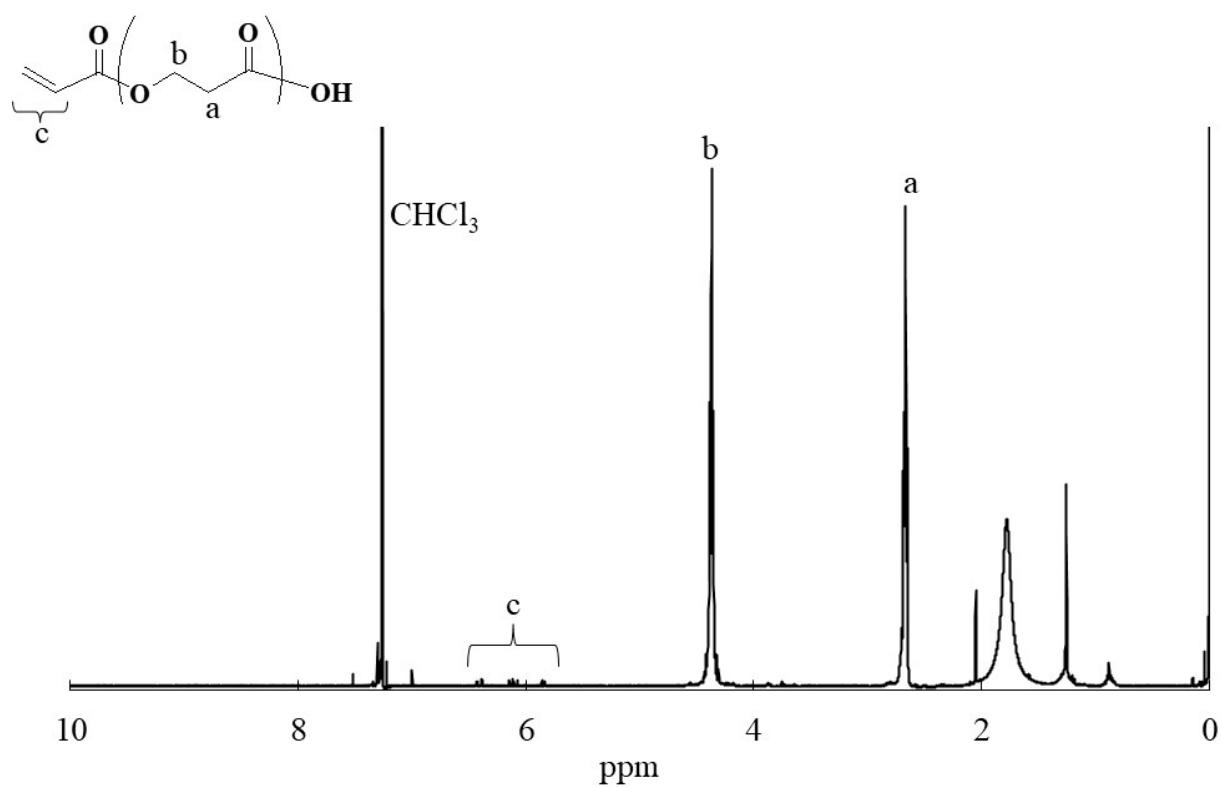

**Figure S1.**  $^1\text{H}$  NMR spectrum of poly( $\beta$ -propiolactone) (PPL) in  $\text{CDCl}_3$ .
